# Supplementary material for: Artificial intelligence for detecting temporomandibular joint osteoarthritis using radiographic image data: A systematic review and meta-analysis of diagnostic test accuracy
Source: PubMed Central journal article supplement (PMC10348514; doi:10.1371/journal.pone.0288631), 2023-07-14
Supplement: pone.0288631.s001.pdf [file pone.0288631.s001.pdf]

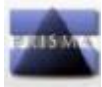

# PRISMA Checklist

| Section/ topic                     | #  | Checklist item                                                                                                                                                                                                                                                                                              | Reported on page # |
|------------------------------------|----|-------------------------------------------------------------------------------------------------------------------------------------------------------------------------------------------------------------------------------------------------------------------------------------------------------------|--------------------|
| <b>TITLE</b>                       |    |                                                                                                                                                                                                                                                                                                             |                    |
| Title                              | 1  | Identify the report as a systematic review, meta- analysis, or both.                                                                                                                                                                                                                                        | 1                  |
| <b>ABSTRACT</b>                    |    |                                                                                                                                                                                                                                                                                                             |                    |
| Structured summary                 | 2  | Provide a structured summary including, as applicable: background; objectives; data sources; study eligibility criteria, participants, and interventions; study appraisal and synthesis methods; results; limitations; conclusions and implications of key findings; systematic review registration number. | 2                  |
| <b>INTRODUCTION</b>                |    |                                                                                                                                                                                                                                                                                                             |                    |
| Rationale                          | 3  | Describe the rationale for the review in the context of what is already known.                                                                                                                                                                                                                              | 2                  |
| Objectives                         | 4  | Provide an explicit statement of questions being addressed with reference to participants, interventions, comparisons, outcomes, and study design ( PICOS) .                                                                                                                                                | 3                  |
| <b>METHODS</b>                     |    |                                                                                                                                                                                                                                                                                                             |                    |
| Protocol and registration          | 5  | Indicate if a review protocol exists, if and where it can be accessed (e. g. , Web address) , and, if available, provide registration information including registration number.                                                                                                                            | 4                  |
| Eligibility criteria               | 6  | Specify study characteristics (e. g. , PICOS, length of follow- up) and report characteristics (e. g. , years considered, language, publication status) used as criteria for eligibility, giving rationale.                                                                                                 | 6                  |
| Information sources                | 7  | Describe all information sources ( e. g. , databases with dates of coverage, contact with study authors to identify additional studies) in the search and date last searched.                                                                                                                               | 5                  |
| Search                             | 8  | Present full electronic search strategy for at least one database, including any limits used, such that it could be repeated.                                                                                                                                                                               | 5                  |
| Study selection                    | 9  | State the process for selecting studies ( i. e. , screening, eligibility, included in systematic review, and, if applicable, included in the meta- analysis) .                                                                                                                                              | 5                  |
| Data collection process            | 10 | Describe method of data extraction from reports ( e. g. , piloted forms, independently, in duplicate) and any processes for obtaining and confirming data from investigators.                                                                                                                               | 5                  |
| Data items                         | 11 | List and define all variables for which data were sought ( e. g. , PICOS, funding sources) and any assumptions and simplifications made.                                                                                                                                                                    | 5                  |
| Risk of bias in individual studies | 12 | Describe methods used for assessing risk of bias of individual studies ( including specification of whether this was done at the study or outcome level) , and how this information is to be used in any data synthesis.                                                                                    | 6                  |
| Summary measures                   | 13 | State the principal summary measures (e. g. , risk ratio, difference in means) .                                                                                                                                                                                                                            | 6                  |
| Synthesis of results               | 14 | Describe the methods of handling data and combining results of studies, if done, including measures of consistency (e.g. , I <sup>2</sup> ) for each meta-analysis.                                                                                                                                         | 6                  |

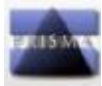

# PRISMA Checklist

| Section/ topic                | #  | Checklist item                                                                                                                                                                                               | Reported on page # |
|-------------------------------|----|--------------------------------------------------------------------------------------------------------------------------------------------------------------------------------------------------------------|--------------------|
| Risk of bias across studies   | 15 | Specify any assessment of risk of bias that may affect the cumulative evidence ( e. g. , publication bias, selective reporting within studies) .                                                             | 6                  |
| Additional analyses           | 16 | Describe methods of additional analyses ( e. g. , sensitivity or subgroup analyses, meta- regression) , if done, indicating which were pre- specified.                                                       | 6                  |
| <b>RESULTS</b>                |    |                                                                                                                                                                                                              |                    |
| Study selection               | 17 | Give numbers of studies screened, assessed for eligibility, and included in the review, with reasons for exclusions at each stage, ideally with a flow diagram.                                              | 7                  |
| Study characteristics         | 18 | For each study, present characteristics for which data were extracted (e. g. , study size, PICOS, follow- up period) and provide the citations.                                                              | 7                  |
| Risk of bias within studies   | 19 | Present data on risk of bias of each study and, if available, any outcome level assessment ( see item 12 ) .                                                                                                 | 7                  |
| Results of individual studies | 20 | For all outcomes considered ( benefits or harms) , present, for each study: ( a) simple summary data for each intervention group ( b) effect estimates and confidence intervals, ideally with a forest plot. | 9                  |
| Synthesis of results          | 21 | Present results of each meta- analysis done, including confidence intervals and measures of consistency.                                                                                                     | 10                 |
| Risk of bias across studies   | 22 | Present results of any assessment of risk of bias across studies ( see Item 15 ) .                                                                                                                           | 8                  |
| Additional analysis           | 23 | Give results of additional analyses, if done (e. g. , sensitivity or subgroup analyses, meta- regression [see Item 16]) .                                                                                    | 10                 |
| <b>DISCUSSION</b>             |    |                                                                                                                                                                                                              |                    |
| Summary of evidence           | 24 | Summarize the main findings including the strength of evidence for each main outcome; consider their relevance to key groups (e. g. , healthcare providers, users, and policy makers) .                      | 11                 |
| Limitations                   | 25 | Discuss limitations at study and outcome level (e. g. , risk of bias) , and at review- level (e. g. , incomplete retrieval of identified research, reporting bias) .                                         | 15                 |
| Conclusions                   | 26 | Provide a general interpretation of the results in the context of other evidence, and implications for future research.                                                                                      | 15                 |
| <b>FUNDING</b>                |    |                                                                                                                                                                                                              |                    |
| Funding                       | 27 | Describe sources of funding for the systematic review and other support (e. g. , supply of data); role of funders for the systematic review.                                                                 |                    |

From: Moher D, Liberati A, Tetzlaff J, Altman DG, The PRISMA Group ( 2 0 0 9 ) . Preferred Reporting Items for Systematic Reviews and Meta- Analyses: The PRISMA Statement. PLoS Med 6 ( 7 ) : e 1 0 0 0 0 9 7 . doi: 10 . 1371/journal. pmed1000097
